# Supplementary material
Source: PubMed Central journal article supplement (PMC11230889)
Supplement: cjcr-36-3-282-S1.pdf [file cjcr-36-3-282-S1.pdf]

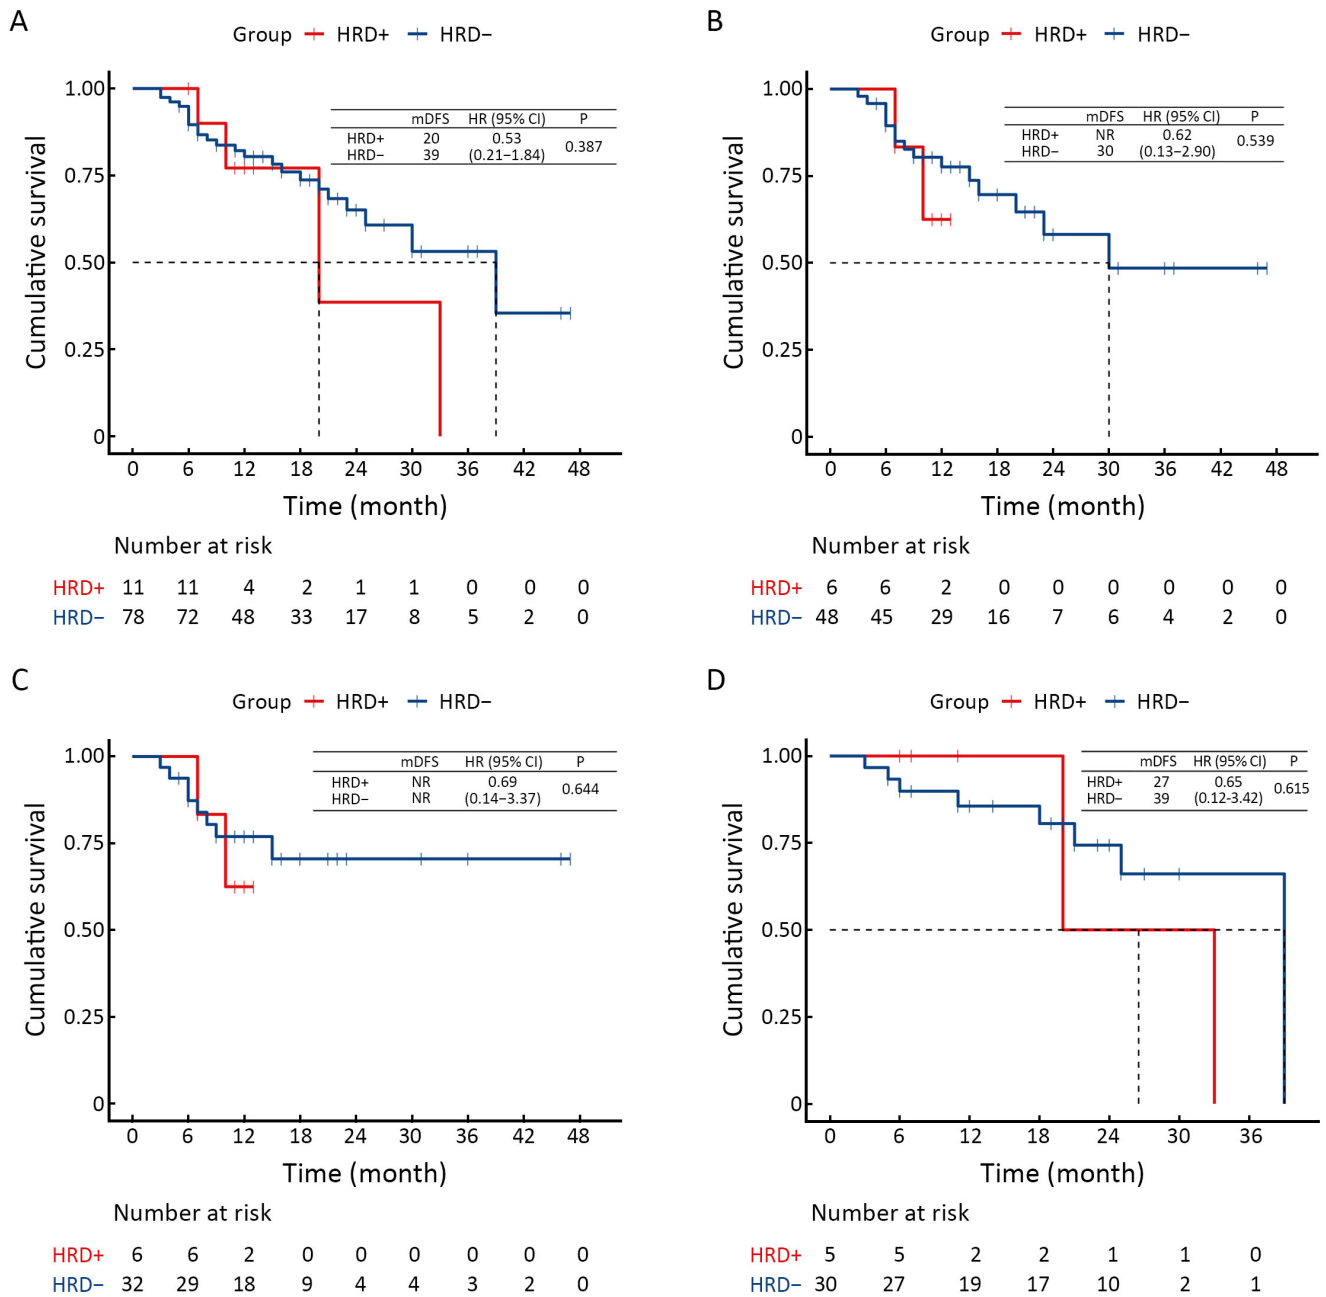

**Figure S1** DFS of difference in different subgroups. (A) All patients with different HRD status; (B) Patients with different HRD status who received adjuvant therapy after surgery; (C) Patients with different HRD status who received adjuvant therapy with platinum after surgery; (D) Patients with different HRD status who not received adjuvant therapy after surgery. DFS, disease-free survival; HRD, homologous recombination defect.

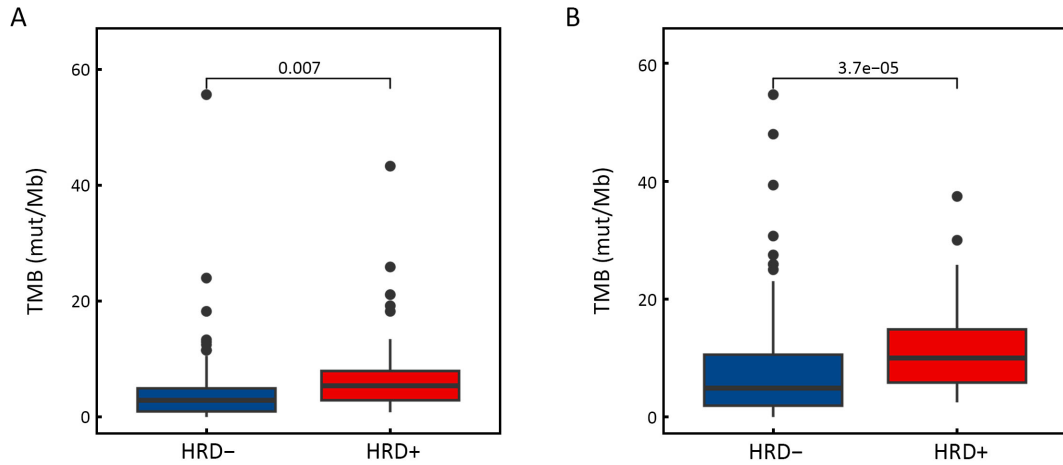

**Figure S2** Difference of TMB values between HRD<sup>-</sup> and HRD<sup>+</sup> patients with mutant *EGFR* or *ALK* (A) or with wide-type *EGFR* or *ALK* (B). TMB, tumor mutation burden; HRD<sup>-</sup>, HRD-negative; HRD<sup>+</sup>, HRD-positive; HRD, homologous recombination defect; *EGFR*, epidermal growth factor receptor; *ALK*, anaplastic lymphoma kinase.

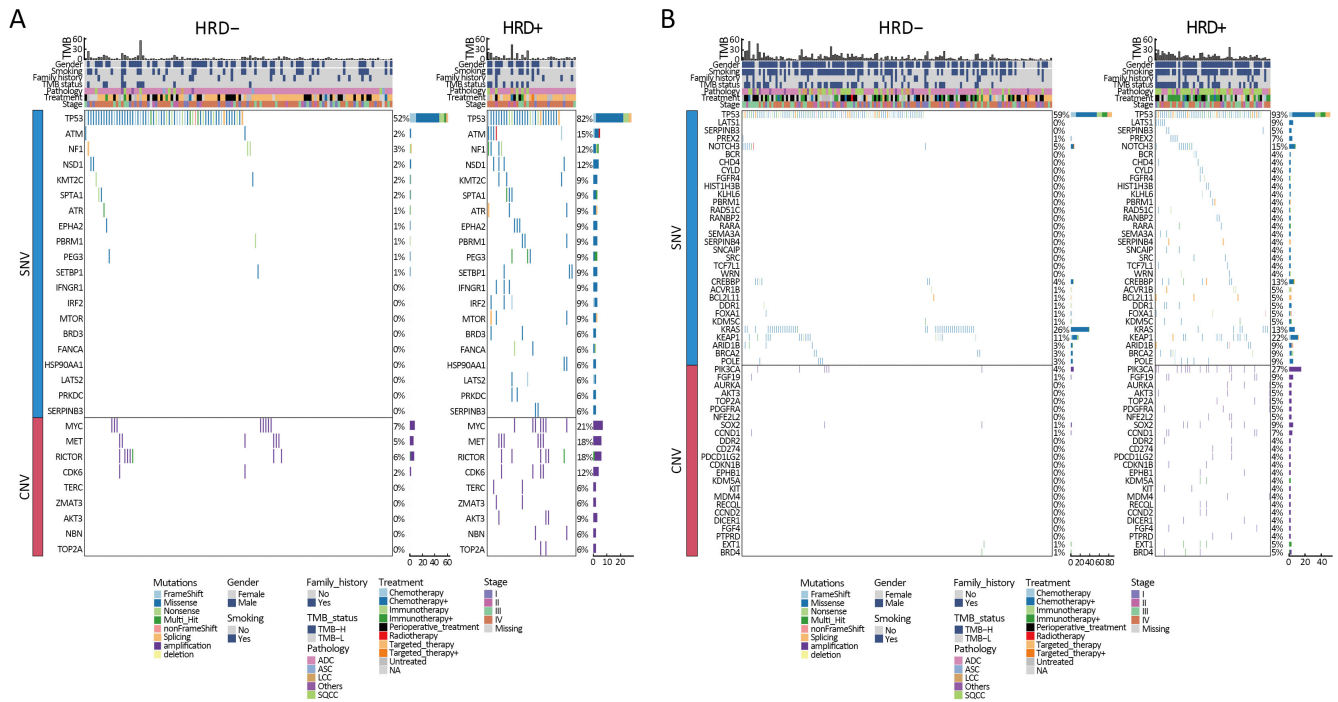

**Figure S3** Genetic alterations with significant difference between HRD<sup>-</sup> and HRD<sup>+</sup> patients with mutant *EGFR* or *ALK* (A) or with wide-type *EGFR* or *ALK* (B). HRD<sup>-</sup>, HRD-negative; HRD<sup>+</sup>, HRD-positive; HRD, homologous recombination defect; SNV, single nucleotide variation; CNV, copy number variation; *EGFR*, epidermal growth factor receptor; *ALK*, anaplastic lymphoma kinase; TMB, tumor mutation burden.

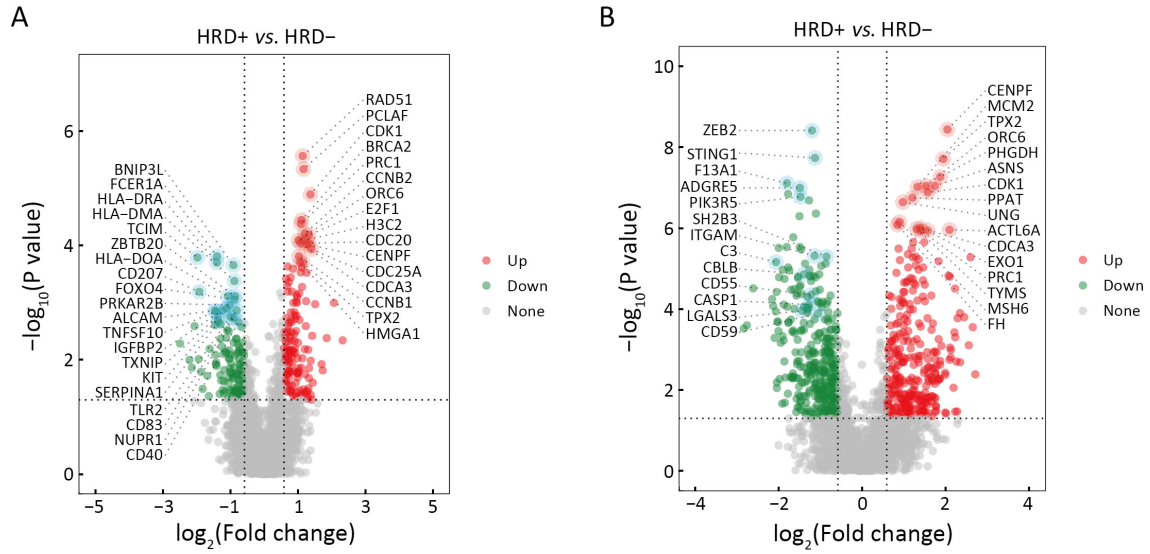

**Figure S4** Differential genes volcano map between HRD+ and HRD- patients with mutant *EGFR* or *ALK* (A) or with wide-type *EGFR* or *ALK* (B). Red is HRD+ up-regulated gene, green is HRD+ down-regulated gene. HRD-, HRD-negative; HRD+, HRD-positive; HRD, homologous recombination defect; *EGFR*, epidermal growth factor receptor; *ALK*, anaplastic lymphoma kinase.

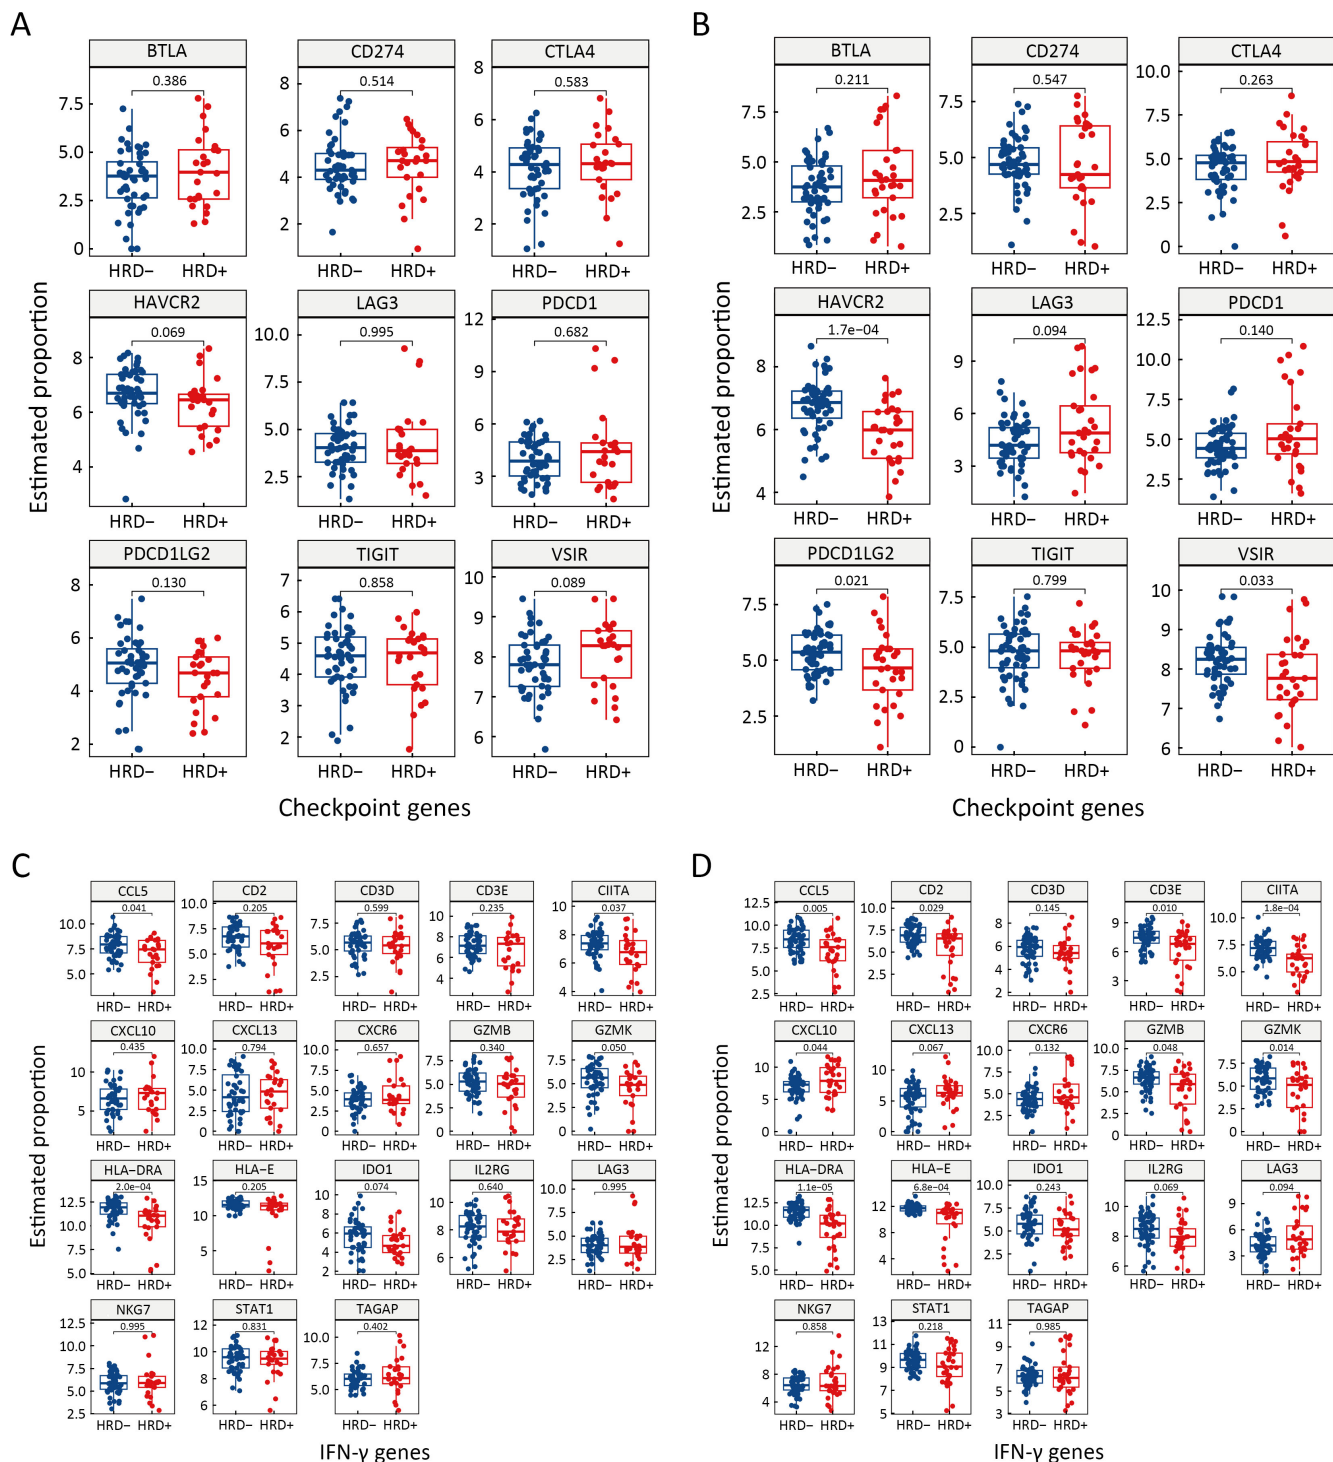

**Figure S5** Expression difference of immune checkpoint and IFN- $\gamma$  genes between HRD+ and HRD- patients with mutant *EGFR/ALK* or with wide-type *EGFR/ALK*. Immune checkpoint genes with mutant *EGFR/ALK* (A) or with wide-type *EGFR/ALK* (B); IFN- $\gamma$  genes with mutant *EGFR/ALK* (C) or with wide-type *EGFR/ALK* (D). HRD-, HRD-negative; HRD+, HRD-positive; HRD, homologous recombination defect; IFN, interferon; *EGFR*, epidermal growth factor receptor; *ALK*, anaplastic lymphoma kinase.

**Table S1** Statistics of HRR mutations loci

| HRR           | No.      |         |          |                  |
|---------------|----------|---------|----------|------------------|
|               | Mutation | Somatic | Germline | Somatic+germline |
| <i>ATM</i>    | 22       | 16      | 4        | 2                |
| <i>ATR</i>    | 19       | 16      | 3        | 0                |
| <i>BARD1</i>  | 8        | 4       | 4        | 0                |
| <i>BRCA1</i>  | 6        | 5       | 1        | 0                |
| <i>BRCA2</i>  | 21       | 15      | 6        | 0                |
| <i>BRIP1</i>  | 10       | 10      | 0        | 0                |
| <i>CDK12</i>  | 10       | 4       | 6        | 0                |
| <i>CHEK1</i>  | 8        | 7       | 1        | 0                |
| <i>CHEK2</i>  | 9        | 7       | 2        | 0                |
| <i>FANCA</i>  | 23       | 12      | 11       | 0                |
| <i>FANCL</i>  | 5        | 3       | 2        | 0                |
| <i>NBN</i>    | 9        | 5       | 4        | 0                |
| <i>PALB2</i>  | 6        | 4       | 2        | 0                |
| <i>MRE11A</i> | 3        | 3       | 0        | 0                |
| <i>RAD51B</i> | 1        | 0       | 1        | 0                |
| <i>RAD51C</i> | 4        | 3       | 1        | 0                |
| <i>RAD51D</i> | 1        | 0       | 1        | 0                |
| <i>RAD54L</i> | 5        | 1       | 4        | 0                |
| Total         | 170      | 115     | 53       | 2                |

HRR, homologous recombination repair.

**Table S2** HRR mutation status between HRD-positive and -negative

| Mutation type               | n (%)               |                      | P     |
|-----------------------------|---------------------|----------------------|-------|
|                             | HRD-positive (n=89) | HRD-negative (n=266) |       |
| HR gene pathogenic mutation |                     |                      | 0.007 |
| Yes                         | 14 (15.7)           | 17 (6.4)             |       |
| No                          | 75 (84.3)           | 249 (93.6)           |       |
| Germline HR gene mutations  |                     |                      | 0.632 |
| Yes                         | 1 (1.1)             | 5 (1.9)              |       |
| No                          | 88 (98.9)           | 261 (98.1)           |       |
| Somatic HR gene mutations   |                     |                      | 0.001 |
| Yes                         | 13 (14.6)           | 12 (4.5)             |       |
| No                          | 76 (85.4)           | 254 (95.5)           |       |

HRR, homologous recombination repair; HRD, homologous recombination deficiency.

**Table S3** Patient statistics of HRR pathogenic mutations

| HRR           | No.                  |         |          |
|---------------|----------------------|---------|----------|
|               | Pathogenic           | Somatic | Germline |
| <i>ATM</i>    | 7                    | 5       | 2        |
| <i>ATR</i>    | 3                    | 3       | 0        |
| <i>BARD1</i>  | 2                    | 1       | 1        |
| <i>BRCA1</i>  | 2                    | 2       | 0        |
| <i>BRCA2</i>  | 7                    | 6       | 1        |
| <i>BRIP1</i>  | 1                    | 1       | 0        |
| <i>CDK12</i>  | 1                    | 1       | 0        |
| <i>CHEK1</i>  | 2                    | 2       | 0        |
| <i>CHEK2</i>  | 2                    | 2       | 0        |
| <i>FANCA</i>  | 4                    | 3       | 1        |
| <i>FANCL</i>  | 0                    | 0       | 0        |
| <i>NBN</i>    | 0                    | 0       | 0        |
| <i>PALB2</i>  | 0                    | 0       | 0        |
| <i>MRE11A</i> | 0                    | 0       | 0        |
| <i>RAD51B</i> | 0                    | 0       | 0        |
| <i>RAD51C</i> | 1                    | 1       | 0        |
| <i>RAD51D</i> | 1                    | 0       | 1        |
| <i>RAD54L</i> | 1                    | 1       | 0        |
| Total         | 34-3=31 <sup>†</sup> | 28      | 6        |

<sup>†</sup>, There are three co-mutations between patients. HRR, homologous recombination repair.
